# Supplementary material
Source: Springer Nature journal article supplement (https://www.springermedizin.de/resource/supplementary/12936_2011_1887_MOESM2_ESM.pdf/9541986)

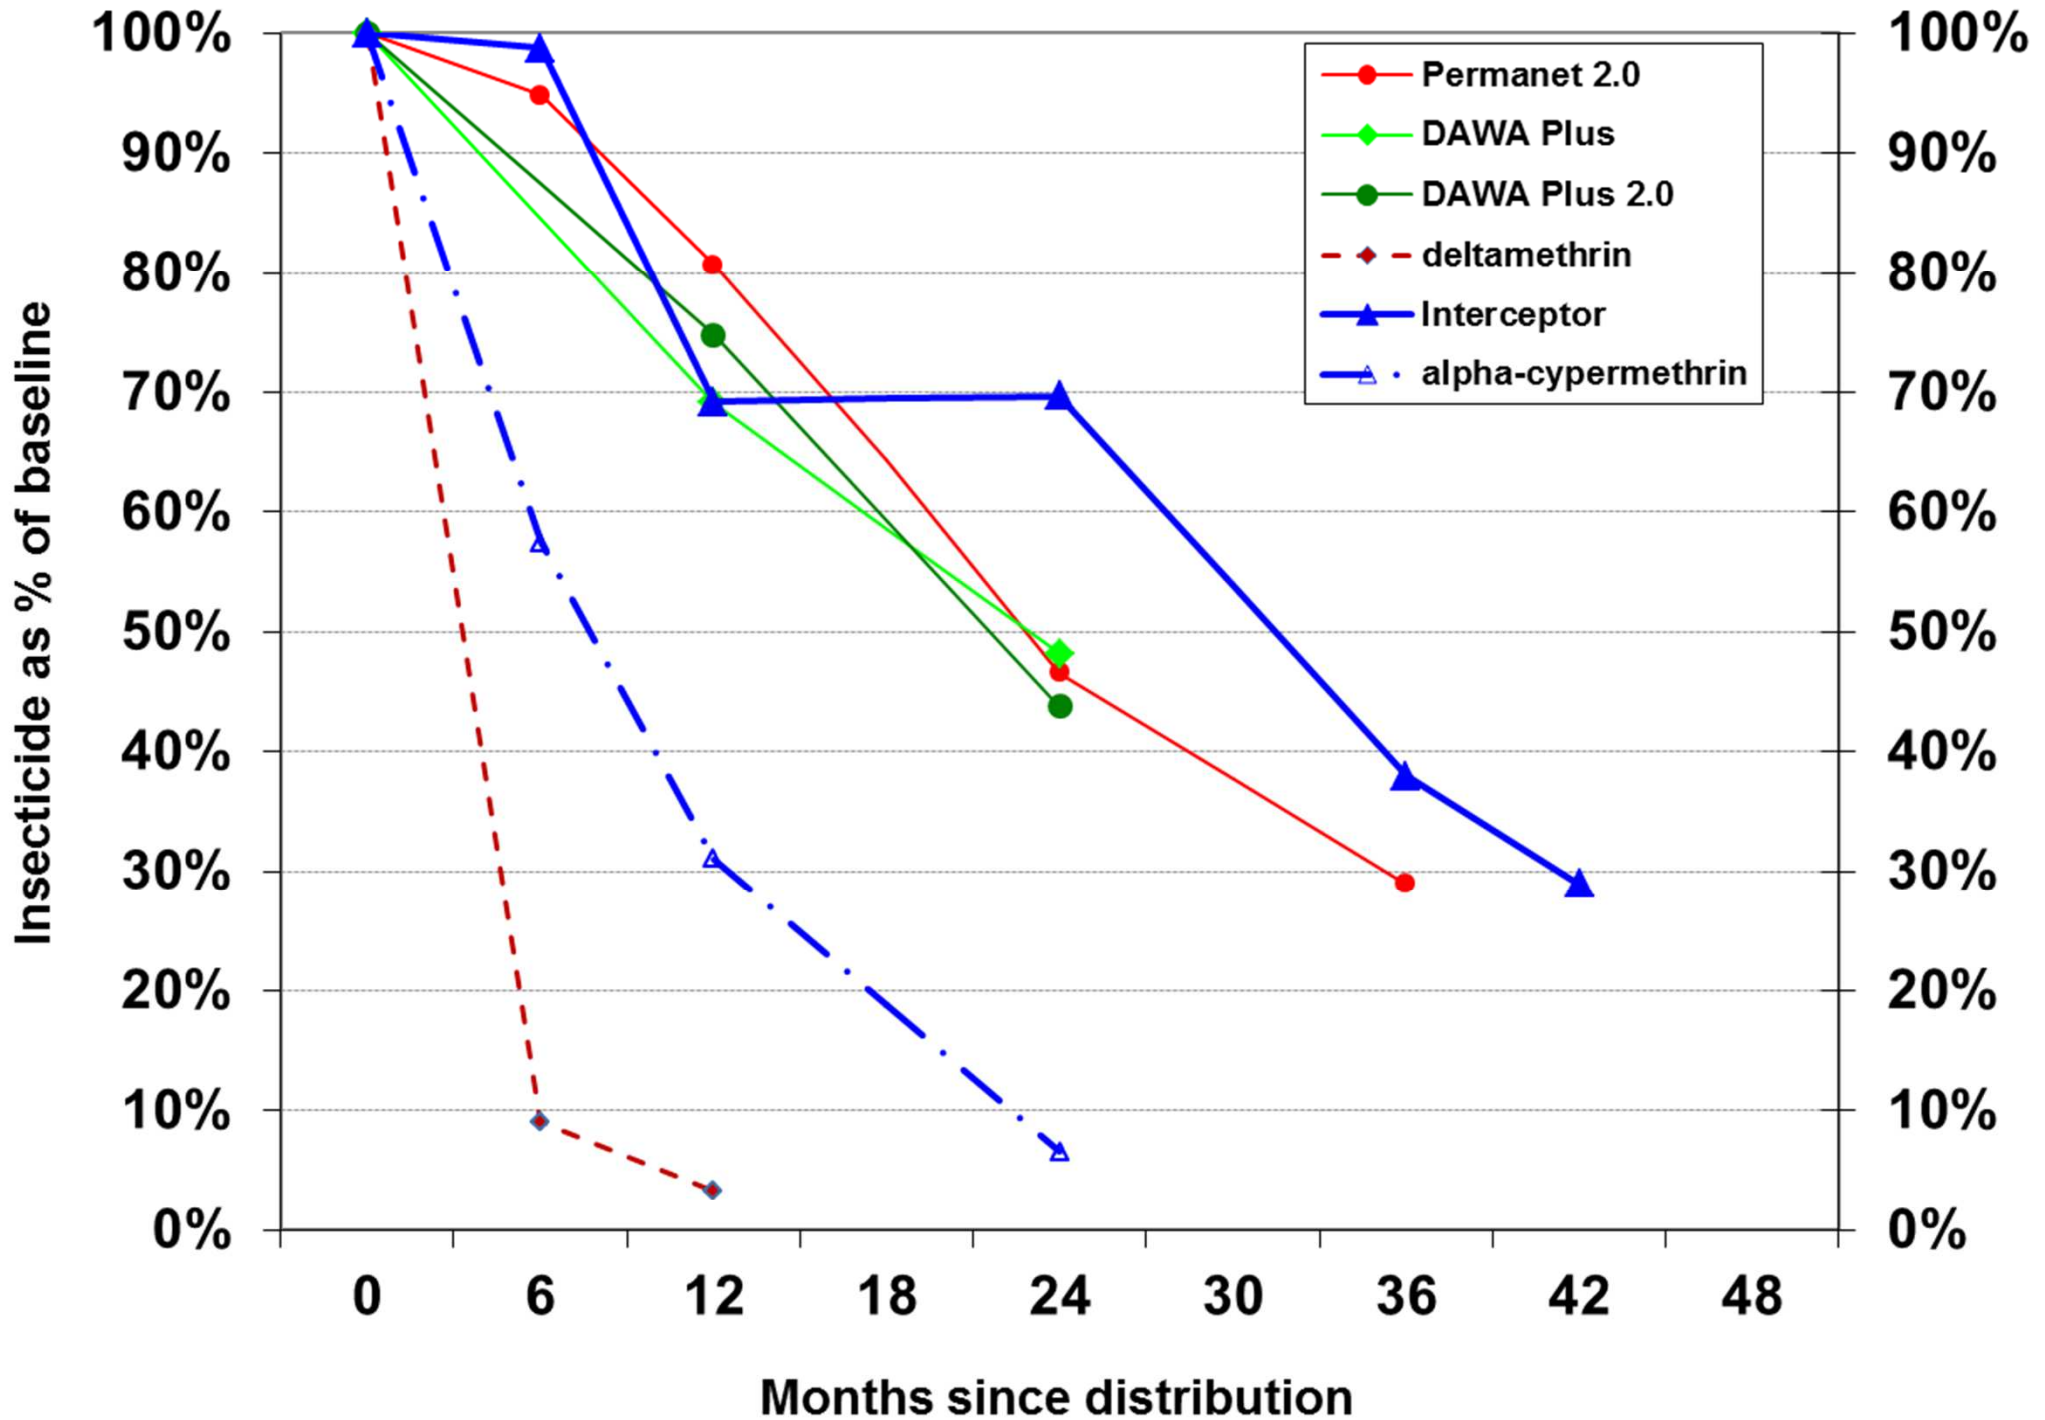

Supplement: MOESM2 [file 9541986]
